# Supplementary material for: Survival and Clinicopathological Significance of SIRT1 Expression in Cancers: A Meta-Analysis
Source: Front Endocrinol (Lausanne). 2019 Mar 13;10:121. doi: 10.3389/fendo.2019.00121 (PMC6424908; doi:10.3389/fendo.2019.00121)
Supplement: Supplementary Table 5 — Meta-regression analysis of heterogeneity for survival outcomes. [file Table_5.XLSX]

## Sheet: Sheet 1
Supplementary Table 5. Meta-regression analysis of heterogeneity for survival outcomes.
Outcomes	Moderators	Variables of regression	HRinteraction (95% CI)	P-value of regression	I2	Cochrane Q p-value
OS	Year	Year	1.001(0.990-1.012)	0.840	81.69%	<0.001
	Sample size	Sample size	2.578(0.674-9.860)	0.166	43.18%	0.152
	Follow up	Follow up	0.741(0.076-7.236)	0.796	72.89%	<0.001
	Country	Intercept	1.648(1.291-2.104)	<0.001	71.56%	<0.001
	Country	Germany	1.001(0.334-2.997)	0.999	71.56%	<0.001
	Country	Hungary	0.388(0.143-1.051)	0.063	71.56%	<0.001
	Country	Iran	1.523(0.380-6.105)	0.553	71.56%	<0.001
	Country	Japan	1.134(0.463-2.775)	0.783	71.56%	<0.001
	Country	Korea	1.079(0.695-1.675)	0.736	71.56%	<0.001
	Country	Netherlands	0.600(0.285-1.263)	0.178	71.56%	<0.001
	Country	Spain	1.330(0.405-4.374)	0.638	71.56%	<0.001
	Country	USA	0.605(0.302-1.215)	0.158	71.56%	<0.001
	Tumor type	Intercept	1.716(1.055-2.792)	0.030	75.22%	<0.001
	Tumor type	Colorectal cancer	0.543(0.293-1.008)	0.053	75.22%	<0.001
	Tumor type	Diffuse large B cell lymphoma	2.786(0.559-13.892)	0.211	75.22%	<0.001
	Tumor type	Endometrial carcinoma	0.629(0.082-4.849)	0.657	75.22%	<0.001
	Tumor type	Esophageal squamous cell carcinoma	1.044(0.412-2.640)	0.928	75.22%	<0.001
	Tumor type	Gastric Cancer	0.851(0.442-1.638)	0.630	75.22%	<0.001
	Tumor type	Hepatocellular Carcinoma	1.168(0.574-2.373)	0.668	75.22%	<0.001
	Tumor type	Laryngeal and hypopharyngeal carcinomas	0.326(0.078-1.370)	0.126	75.22%	<0.001
	Tumor type	NSCLC	1.071(0.521-2.204)	0.852	75.22%	<0.001
	Tumor type	Osteosarcoma	0.960(0.384-2.399)	0.930	75.22%	<0.001
	Tumor type	Ovarian cancer	1.135(0.478-2.692)	0.774	75.22%	<0.001
	Tumor type	Pancreatic ductal adenocarcinoma	0.961(0.294-3.144)	0.948	75.22%	<0.001
	Tumor type	Pelvis chondrosarcoma	0.711(0.080-6.345)	0.760	75.22%	<0.001
	Tumor type	Renal cell carcinoma	2.208(0.520-9.383)	0.283	75.22%	<0.001
	Tumor type	Soft tissue sarcoma	5.863(1.115-30.823)	0.037	75.22%	<0.001
	Tumor type	Uterine cervical cancer	0.880(0.208-3.727)	0.862	75.22%	<0.001
	Race	Intercept	1.705(1.414-2.056)	<0.001	73.32%	<0.001
	Race	Caucasian	0.619(0.411-0.932)	0.022	73.32%	<0.001
	Sample type	Intercept	1.430(0.353-5.799)	0.617	81.72%	<0.001
	Sample type	Tissue	1.097(0.267-4.510)	0.898	81.72%	<0.001
DFS	Year	Year	1.001(0.982-1.020)	0.937	74.67%	<0.001
	Follow up	Follow up	3.264(0.213-50.119)	0.396	93.08%	<0.001
	Country	Intercept	2.217(1.424-3.453)	<0.001	72.83%	<0.001
	Country	Japan	0.668(0.155-2.871)	0.587	72.83%	<0.001
	Country	Korea	0.589(0.317-1.093)	0.093	72.83%	<0.001
	Country	Netherlands	0.606(0.220-1.667)	0.332	72.83%	<0.001
	Tumor type	Intercept	1.770(1.108-2.826)	0.017	80.62%	<0.001
	Tumor type	Colorectal cancer	0.890(0.408-1.943)	0.770	80.62%	<0.001
	Tumor type	Endometrial carcinoma	0.836(0.176-3.964)	0.822	80.62%	<0.001
	Tumor type	Esophageal squamous cell carcinoma	1.008(0.294-3.461)	0.990	80.62%	<0.001
	Tumor type	Hepatocellular Carcinoma	0.831(0.314-2.197)	0.709	80.62%	<0.001
	Race	Intercept	1.683(1.235-2.294)	0.001	74.27%	<0.001
	Race	Caucasian	0.799(0.296-2.151)	0.656	74.27%	<0.001
EFS	Year	Year	0.996(0.971-1.022)	0.782	0.00%	0.628
	Country	Intercept	2.714(1.506-4.894)	0.001	0.00%	0.672
	Country	USA	0.840(0.329-2.148)	0.716	0.00%	0.672
	Race	Intercept	2.714(1.506-4.894)	0.001	0.00%	0.672
	Race	Caucasian	0.840(0.329-2.148)	0.716	0.00%	0.672
CCS	Sample size	Sample size	1.018(0.245-4.238)	0.980	90.45%	0.001
	Follow up	Follow up	5.431(0.340-86.753)	0.231	90.45%	0.001
	Country	Intercept	1.863(0.504-6.885)	0.351	85.99%	0.001
	Country	Japan	0.517(0.106-2.508)	0.413	85.99%	0.001
	Country	Korea	1.070(0.154-7.415)	0.945	85.99%	0.001
	Country	USA	0.526(0.083-3.316)	0.494	85.99%	0.001
	Tumor type	Intercept	1.347(0.585-3.099)	0.484	71.66%	0.029
	Tumor type	Gastric Cancer	1.077(0.265-4.374)	0.918	71.66%	0.029
	Tumor type	Head and neck squamous cell carcinoma	0.475(0.117-1.927)	0.298	71.66%	0.029
	Tumor type	Renal cell carcinoma	1.530(0.309-7.571)	0.602	71.66%	0.029
	Race	Intercept	1.318(0.709-2.448)	0.383	81.64%	<0.001
	Race	Caucasian	0.744(0.189-2.934)	0.672	81.64%	<0.001
HRinteraction: interaction effect calculated by meta-regression; Positive direction indicates that possible moderators might strengthen survival outcomes in the SIRT1 overexpression relative to underexpression; Bold italics indicate statistically significant values (P < 0.05).
